# Supplementary material for: Gold Nanoprobes for Detection of a Crucial EGFR Deletion for Early Diagnosis of Non-Small-Cell Lung Cancer
Source: MDPI journal article supplement (doi:10.3390/bios14040162), 2024-03-29
Supplement: s1 [file s1]

Article

# Gold Nanoprobes for Detection of a Crucial EGFR Deletion for Early Diagnosis of Non-Small-Cell Lung Cancer

Maria Enea <sup>1,\*</sup>, Anupong Nuekaew <sup>1</sup>, Ricardo Franco <sup>2,3,\*</sup> and Eulália Pereira <sup>1</sup>

<sup>1</sup> LAQV /REQUIMTE, Departamento de Química e Bioquímica, Faculdade de Ciências, Universidade do Porto, Rua Campo Alegre, 687, Porto, 4169-007, Portugal; anue279@aucklanduni.ac.nz (A.N); eulalia.pereira@fc.up.pt (E.P)

<sup>2</sup> Associate Laboratory i4HB—Institute for Health and Bioeconomy, Faculdade de Ciências e Tecnologia, Universidade NOVA de Lisboa, 2819-516 Caparica, Portugal

<sup>3</sup> UCIBIO—Applied Molecular Biosciences Unit, Departamento de Química, Faculdade de Ciências e Tecnologia, Universidade NOVA de Lisboa, 2819-516 Caparica, Portugal

\* Correspondence: menea@fc.up.pt (M.E.); ricardo.franco@fct.unl.pt (R.F.)

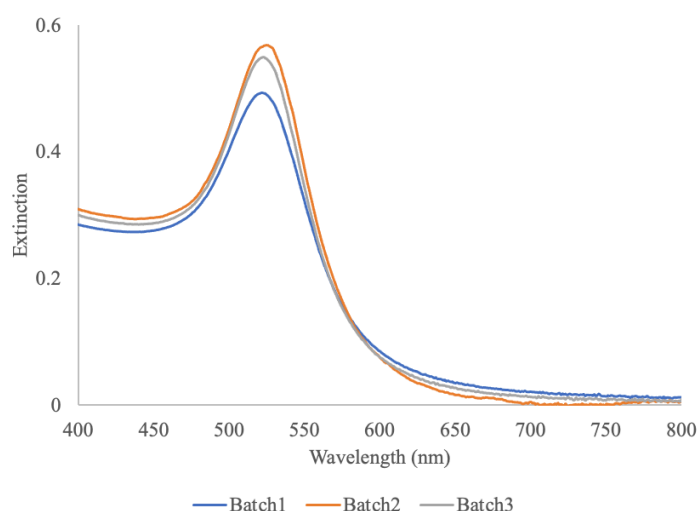

**Figure S1.** UV-Vis spectra of three different batches of the synthesized 35 nm AuNPs.

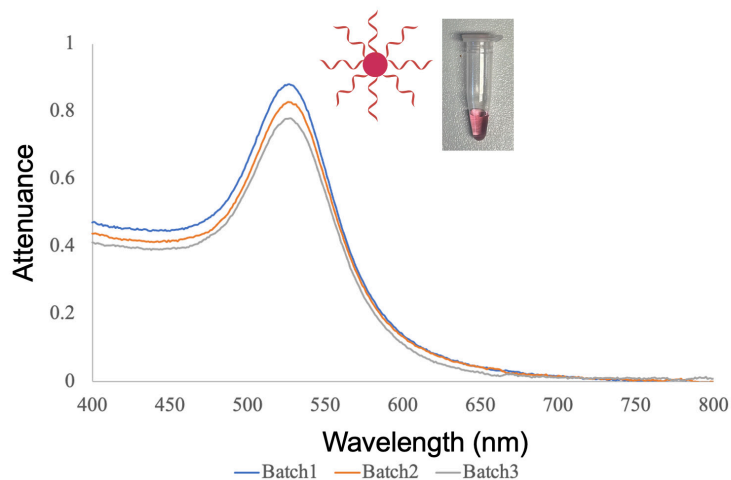

**Figure S2.** UV-Vis spectra of three different batches of Au nanoprobe obtained with a oligonucleotide:AuNPs ratio of 1000.

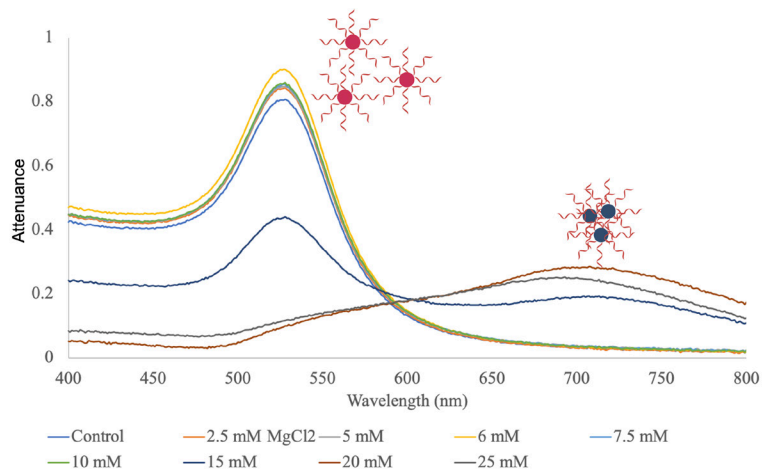

**Figure S3.** UV-Vis spectra analysis of the Au nanoprobe ratio 1000 incubated with  $MgCl_2$  at concentrations up to 25 mM.

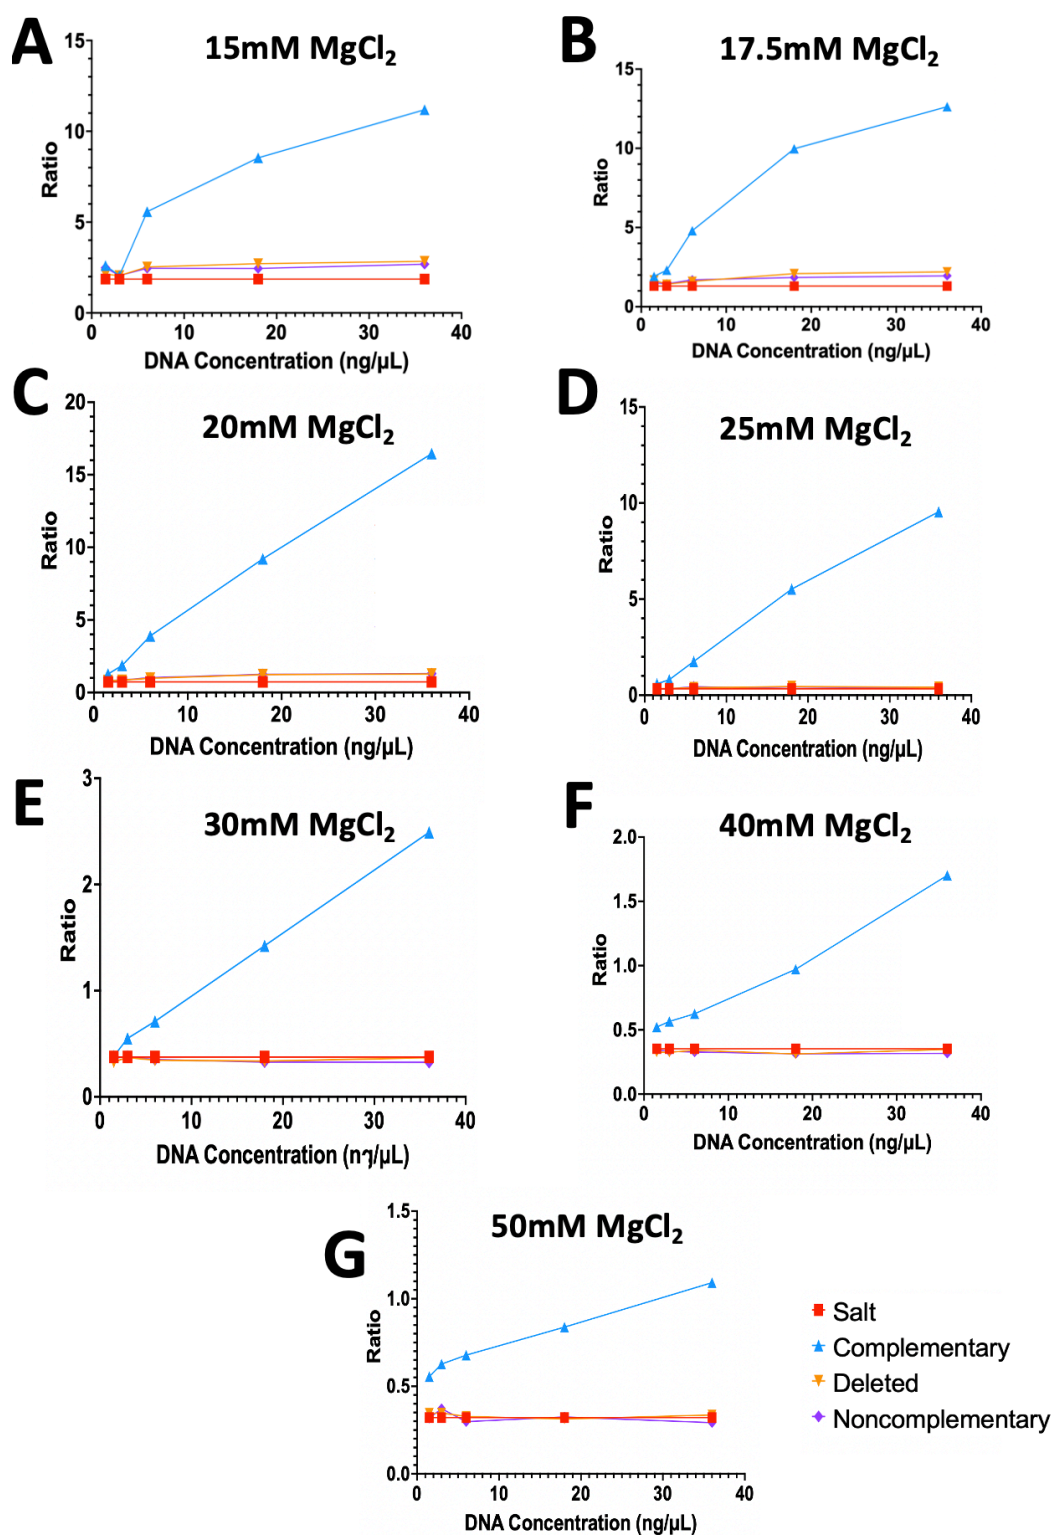

**Figure S4.** DNA concentration dependent effect of the AbsNon-Agg/AbsAgg ratio for 35 nm Au nanoprobe using three different targets: totally complementary (blue points and lines), deleted/noncomplementary (orange points and lines) and totally noncomplementary (purple points and lines) tested at different  $\text{MgCl}_2$  concentrations: 15 mM (A), 17.5mM (B), 20mM(C), 25 mM (D), 30 mM (E), 40mM (F) and 50mM(G).

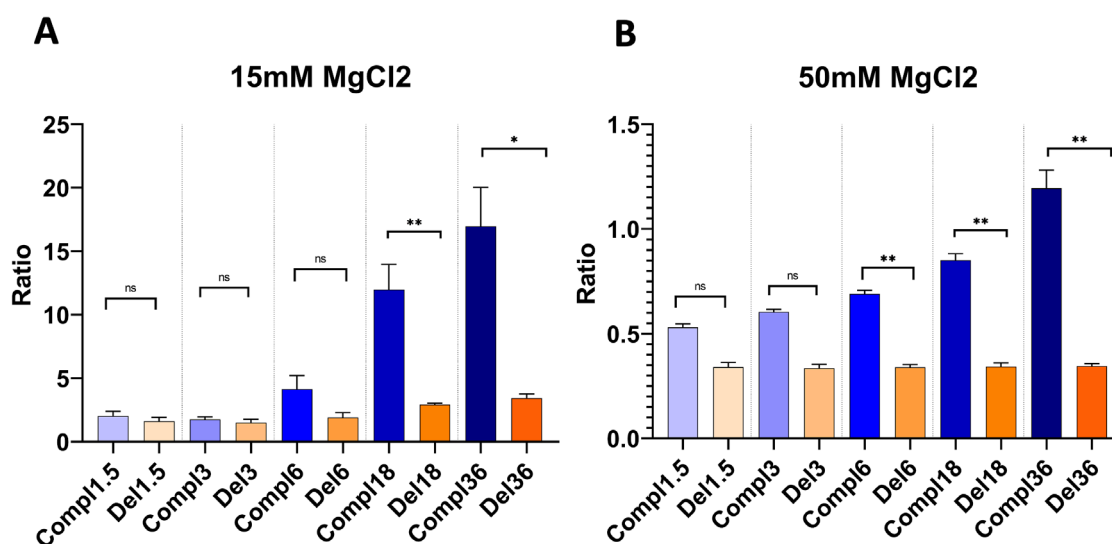

**Figure S5.** The bar graphs represent differences in AbsNon-Agg/AbsAgg ratios between complementary normal DNA (purple bar) and deleted/noncomplementary DNA (Orange lines) targets tested at different MgCl<sub>2</sub> concentrations: at 15 mM (A) and 50 mM (B). One asterisk indicating  $p \leq 0.05$ , two  $p \leq 0.01$ , three  $p \leq 0.001$  and four asteriks indicating  $p \leq 0.0001$  in cases of statistical significance.
